# Supplementary material
Source: bioRxiv or medRxiv preprint supplement (https://www.biorxiv.org/content/biorxiv/early/2019/12/02/862243/DC4/embed/media-4.pdf)
Supplement: Supplementary file [file media-4.pdf]

**Table S4**

*A. thaliana* (MA3)

| context | annotation | alpha        | beta         | beta/alpha | FM         | RM        | F-value  | df RM | df FM | P--value     |
|---------|------------|--------------|--------------|------------|------------|-----------|----------|-------|-------|--------------|
| CG      | global     | 0.0001942304 | 0.0008340002 | 4.294      | ABneutral  | Abnull    | 136.2307 | 65    | 61    | 1.103063E-29 |
| CG      | exon       | 0.0005635082 | 0.001829657  | 3.247      | ABneutral  | Abnull    | 210.1967 | 65    | 61    | 6.177088E-35 |
| CG      | promoter   | 0.0001128601 | 0.001141507  | 10.114     | ABneutral  | Abnull    | 108.4535 | 65    | 61    | 5.190251E-27 |
| CG      | TE         | NA           | NA           | NA         | ABneutral  | Abnull    | 1.0608   | 65    | 61    | 0.383711     |
| CG      | global     |              |              |            | ABselectUU | Abneutral | 0.0000   | 62    | 61    | 1            |
| CG      | exon       |              |              |            | ABselectUU | Abneutral | 0.0000   | 62    | 61    | 1            |
| CG      | promoter   |              |              |            | ABselectUU | Abneutral | 0.1053   | 62    | 61    | 0.7467267    |
| CG      | TE         |              |              |            | ABselectUU | Abneutral | 0.0000   | 62    | 61    | 1            |
| CG      | global     |              |              |            | ABselectMM | Abneutral | 0.0001   | 62    | 61    | 0.9934013    |
| CG      | exon       |              |              |            | ABselectMM | Abneutral | 0.0000   | 62    | 61    | 1            |
| CG      | promoter   |              |              |            | ABselectMM | Abneutral | 0.0000   | 62    | 61    | 1            |
| CG      | TE         |              |              |            | ABselectMM | Abneutral | 0.1116   | 62    | 61    | 0.739439     |
| CHG     | global     | NA           | NA           | NA         | ABneutral  | Abnull    | 2.0182   | 65    | 61    | 0.1030624    |
| CHG     | exon       | NA           | NA           | NA         | ABneutral  | Abnull    | 0.0141   | 65    | 61    | 0.9995992    |
| CHG     | promoter   | 1.783862E-06 | 0.0001055335 | 59.160     | ABneutral  | Abnull    | 5.0076   | 65    | 61    | 0.001479819  |
| CHG     | TE         | 5.517707E-05 | 0.0001307905 | 2.370      | ABneutral  | Abnull    | 5.7078   | 65    | 61    | 0.0005720866 |
| CHG     | global     |              |              |            | ABselectUU | Abneutral | 0.9363   | 62    | 61    | 0.3370451    |
| CHG     | exon       |              |              |            | ABselectUU | Abneutral | 0.0000   | 62    | 61    | 1            |
| CHG     | promoter   |              |              |            | ABselectUU | Abneutral | 0.0707   | 62    | 61    | 0.7912417    |
| CHG     | TE         |              |              |            | ABselectUU | Abneutral | 0.5221   | 62    | 61    | 0.4727021    |
| CHG     | global     |              |              |            | ABselectMM | Abneutral | 0.8975   | 62    | 61    | 0.3471843    |
| CHG     | exon       |              |              |            | ABselectMM | Abneutral | 0.0000   | 62    | 61    | 1.00E+00     |
| CHG     | promoter   |              |              |            | ABselectMM | Abneutral | 0.0000   | 62    | 61    | 1            |
| CHG     | TE         |              |              |            | ABselectMM | Abneutral | 0.8804   | 62    | 61    | 0.3517958    |
| CHH     | global     | NA           | NA           | NA         | ABneutral  | Abnull    | 1.0187   | 65    | 61    | 0.404864     |
| CHH     | exon       | NA           | NA           | NA         | ABneutral  | Abnull    | 0.1767   | 65    | 61    | 0.9495845    |
| CHH     | promoter   | 1.71043E-08  | 4.1274E-06   | 241.308    | ABneutral  | Abnull    | 2.9878   | 65    | 61    | 0.02558529   |
| CHH     | TE         | NA           | NA           | NA         | ABneutral  | Abnull    | 0.2803   | 65    | 61    | 0.8896153    |
| CHH     | global     |              |              |            | ABselectUU | Abneutral | 0.7073   | 62    | 61    | 0.4036315    |
| CHH     | exon       |              |              |            | ABselectUU | Abneutral | 0.4033   | 62    | 61    | 0.5277759    |
| CHH     | promoter   |              |              |            | ABselectUU | Abneutral | 0.0000   | 62    | 61    | 1            |
| CHH     | TE         |              |              |            | ABselectUU | Abneutral | 0.0000   | 62    | 61    | 1            |
| CHH     | global     |              |              |            | ABselectMM | Abneutral | 1.2129   | 62    | 61    | 0.275082     |
| CHH     | exon       |              |              |            | ABselectMM | Abneutral | 0.2588   | 62    | 61    | 0.6127902    |
| CHH     | promoter   |              |              |            | ABselectMM | Abneutral | 0.0000   | 62    | 61    | 1            |
| CHH     | TE         |              |              |            | ABselectMM | Abneutral | 0.0684   | 62    | 61    | 0.7945567    |

FM = Full model  
 RM = Reduced model  
 df = degrees of freedom  
  Best performing model

Table S4: Epimutation rate estimates and model selection results for pedigree MA3
